# Supplementary material for: Prevalence of Malnutrition Inflammation Complex Syndrome among adult Chronic Kidney Disease patients on dialysis – a Systematic review and Meta-analysis
Source: Research Square preprint supplement (doi:10.21203/rs.3.rs-8557105/v1), 2026-01-29
Supplement: Supplementary file 1 [file 4bf2220dc532c08ad8cab4cd.docx]

**Supplementary Material:**

**S1. Search Strategy**

A comprehensive search was conducted using a combination of MeSH terms and keywords:

("Malnutrition Inflammation Complex" OR MICS OR "Protein-Energy Malnutrition" OR PEM OR PEW OR "Malnutrition")

AND ("Inflammation" OR CRP OR TNF- α OR IL-6)

AND

("Chronic Kidney Disease" OR CKD OR "End-stage renal disease" OR ESRD)

AND

("Renal Replacement Therapy" OR RRT OR Dialysis OR "Hemodialysis" OR "Peritoneal Dialysis")

AND

(Prevalence OR Epidemiology)

**Search strategies for each database.**

**PubMed**: Filters applied: Clinical Trial, Clinical Trial, Phase I, Clinical Trial, Phase II, Clinical Trial Protocol, Controlled Clinical Trial, Corrected and Republished Article, Government Publication, Meta-Analysis, Multicenter Study, Network Meta-Analysis, Observational Study, Randomized Controlled Trial, Systematic Review.

**Embase** : ('malnutrition inflammation complex':ab,ti OR mics:ab,ti OR 'protein energy wasting':ab,ti OR pew:ab,ti OR pem:ab,ti OR malnutrition:ab,ti OR inflammation:ab,ti OR crp:ab,ti) AND ('chronic kidney disease'/exp OR ckd:ab,ti OR 'end stage renal disease':ab,ti OR esrd:ab,ti) AND ('renal replacement therapy'/exp OR dialysis:ab,ti OR 'hemodialysis':ab,ti OR 'peritoneal dialysis':ab,ti) AND (prevalence:ab,ti OR epidemiology:ab,ti) AND ([cochrane review]/lim OR [controlled clinical trial]/lim OR [systematic review]/lim OR [randomized controlled trial]/lim OR [meta analysis]/lim)

**Scopus**: (TITLE-ABS-KEY("malnutrition inflammation complex" OR MICS OR "protein energy wasting" OR PEW OR PEM OR malnutrition)

AND (TITLE-ABS-KEY (“inflammation” OR CRP OR TNF- α OR IL-6))

AND

(TITLE-ABS-KEY("chronic kidney disease" OR CKD OR "end stage renal disease" OR ESRD))

AND

(TITLE-ABS-KEY("renal replacement therapy" OR RRT OR dialysis OR "hemodialysis" OR "peritoneal dialysis"))

AND

(TITLE-ABS-KEY(prevalence OR epidemiology))

**Overall Heterogeneity**

**Supplementary Figure 1: Baujat plot displaying each study’s contribution to overall heterogeneity and influence on the pooled prevalence of MICS.**

**Supplementary Figure 2: Influence diagnostic plots for the meta-analysis of MICS prevalence among CKD patients on dialysis.**

**Supplementary Figure 3: Meta-regression bubble plot showing the relationship between sample size and effect size for MICS prevalence among CKD patients on dialysis.**

**Supplementary Figure 4: Funnel plot assessing publication bias in studies reporting MICS prevalence among CKD patients on dialysis.**
